# Supplementary material for: Inference of patient-specific pathway activities from multi-dimensional cancer genomics data using PARADIGM
Source: PubMed Central journal article supplement — Bioinformatics. 2010 Jun 1;26(12):i237–45. doi: 10.1093/bioinformatics/btq182 (PMC2881367; doi:10.1093/bioinformatics/btq182), 2010-06-01
Supplement: btq182_1.pdf [file btq182_1.pdf]

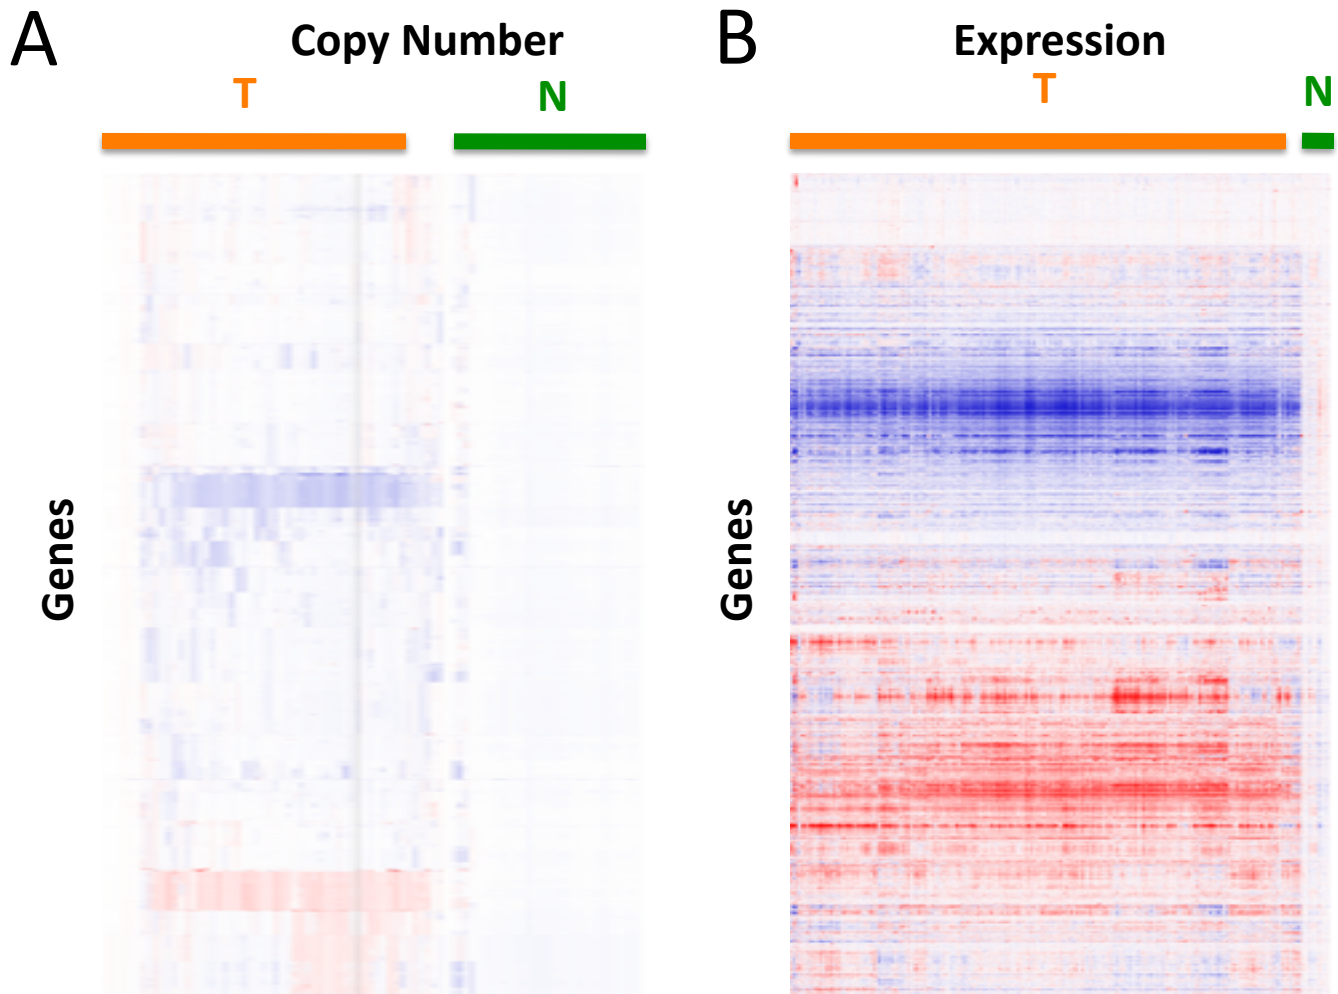

**Supplementary Figure 1.** Clustering glioblastoma multiform (GBM) datasets with HOPACH did not reveal any obvious patient sub-types when using either gene-level copy number or expression data. Patient samples (columns) were clustered according to gene-level copy number or expression (rows). Clustering may be dominated by the nearly patient-wide amplifications and deletions (and correlated high and low expression) for a subset of genes in the genome (large blue and red swaths in the heatmaps). **A.** Copy number estimates from competitive genome hybridization for 17,508 probes across 267 tumor (left) and 170 normal (right). **B.** Microarray gene expression data for 11,240 probes across 243 tumor (left) and 10 normal (right) samples.
